# Supplementary material for: Prognostic Factors for Staying at Work for Partially Sick-Listed Workers with Subjective Health Complaints: A Prospective Cohort Study
Source: MDPI journal article supplement (doi:10.3390/ijerph17197184), 2020-09-30
Supplement: s1 [file s1]

**Table 1.** General questions and collected data from the Dutch Social Security Institute.

| Domains                                                     | Categories/ Ranges                                                        | General questions from the questionnaires at baseline (T0) | Data from the Dutch Social Security Institute |
|-------------------------------------------------------------|---------------------------------------------------------------------------|------------------------------------------------------------|-----------------------------------------------|
| <b>Participants' demographics</b>                           |                                                                           |                                                            |                                               |
| Age in years                                                | 18-65                                                                     | X                                                          | X                                             |
| Gender                                                      | Male / Female                                                             | X                                                          | X                                             |
| Marital status (married or partner)                         | Yes / No                                                                  | X                                                          | X                                             |
| Breadwinner of the family                                   | Yes / No                                                                  | X                                                          |                                               |
| Land of birth                                               | The Netherlands / Other country                                           | X                                                          |                                               |
| Educational level                                           | Primary or Secondary school / High school / Bachelor's or Master's degree | X                                                          | X                                             |
| <b>Participants' socio-economic and work-related status</b> |                                                                           |                                                            |                                               |
| Collar job                                                  | Blue / White / Pink                                                       | X                                                          |                                               |
| Employed                                                    | Yes / No                                                                  | X                                                          |                                               |
| Usual working time in hours                                 | 4-60                                                                      | X                                                          |                                               |
| Regular work schedule                                       | Yes / No                                                                  | X                                                          |                                               |
| Managerial position                                         | Yes / No                                                                  | X                                                          |                                               |
| Job demands                                                 | Psychological / Physical / Combination of both                            | X                                                          |                                               |
| Previous absenteeism for the same health complaint          | Yes / No                                                                  | X                                                          |                                               |
| Work disability benefits                                    | No or Partial / Full                                                      |                                                            | X                                             |
| Adjustments at work                                         | Yes / No                                                                  | X                                                          |                                               |
| Interventions at work (e.g., job coaching)                  | Yes / No                                                                  | X                                                          |                                               |
| <b>Participants' health</b>                                 |                                                                           |                                                            |                                               |
| Use of specialist care in the last 2 years                  | Yes / No                                                                  | X                                                          |                                               |
| Use of psychiatric care in the last 2 years                 | Yes / No                                                                  | X                                                          |                                               |
| Use of medication                                           | Yes / No                                                                  | X                                                          |                                               |
| Subjective health complaints (SHC)                          | Yes / No                                                                  |                                                            | X                                             |
| <b>Participants' self-perceived ability</b>                 |                                                                           |                                                            |                                               |
| Positive expectations for staying at work                   | Yes or Inconclusive / No                                                  | X                                                          |                                               |

**Figure 1.** Multicollinearity analyses for workers with subjective health complaints (SHC).

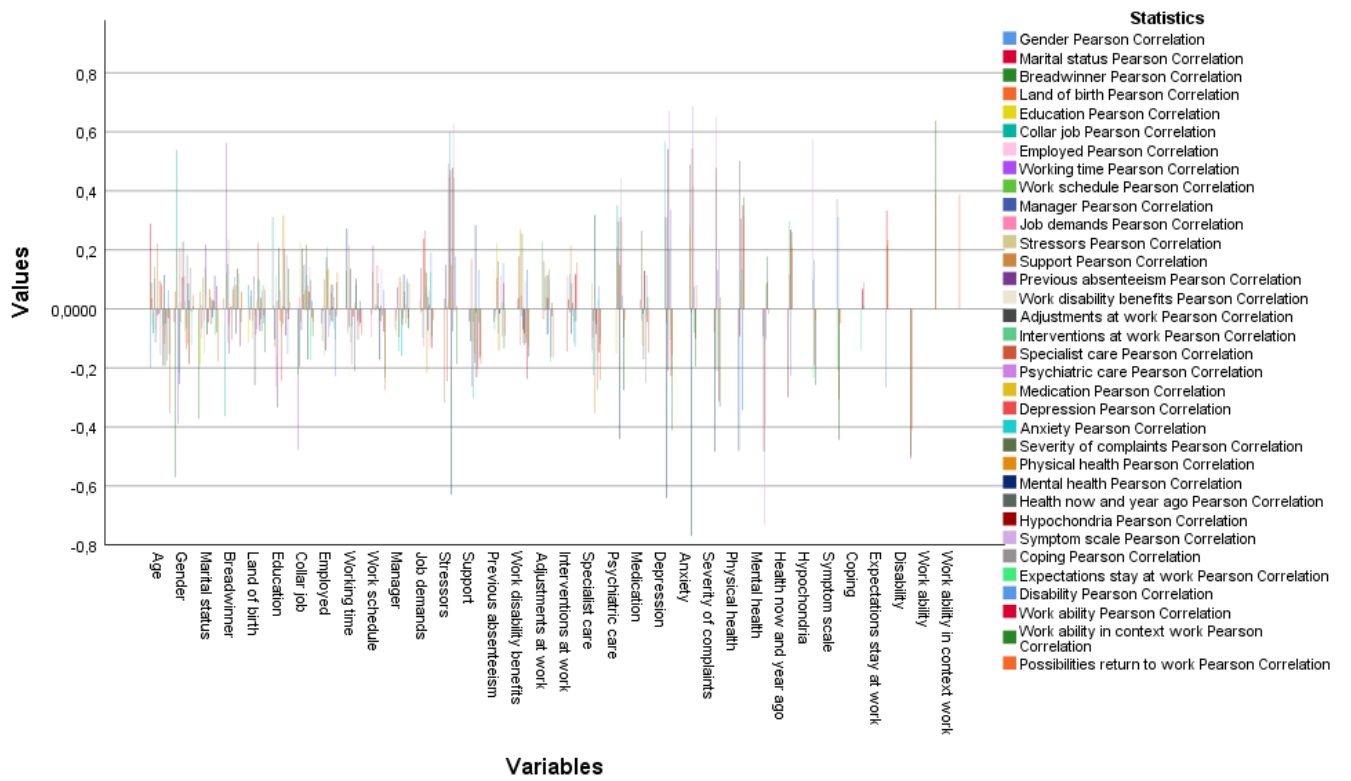

**Table 2. Variance inflation factor (VIF) multicollinearity scores for workers with subjective health complaints (SHC).**

| <b>Variables</b>                                   | <b>VIF score</b> |
|----------------------------------------------------|------------------|
| Age                                                | 1.70             |
| Gender                                             | 3.66             |
| Marital status                                     | 2.10             |
| Breadwinner                                        | 4.41             |
| Land of birth                                      | 1.76             |
| Education                                          | 2.15             |
| Collar job                                         | 2.65             |
| Employed                                           | 1.59             |
| Working time                                       | 3.91             |
| Work schedule                                      | 1.58             |
| Managerial position                                | 1.70             |
| Job demands                                        | 1.84             |
| Stressors                                          | 4.32             |
| Support                                            | 1.76             |
| Previous absenteeism for the same health complaint | 1.58             |
| Work disability benefits                           | 1.73             |
| Adjustments at work                                | 1.99             |
| Interventions at work                              | 1.66             |
| Specialist care                                    | 1.64             |
| Psychiatric care                                   | 2.16             |
| Medication                                         | 1.90             |
| Depressive disorder                                | 4.98             |
| Anxiety disorder                                   | 4.53             |
| Severity of complaints                             | 3.62             |
| Physical health                                    | 4.40             |
| Mental health                                      | 9.38             |
| Health compared to a year ago                      | 2.24             |
| Hypochondria                                       | 2.71             |
| Symptom scale                                      | 6.47             |
| Coping                                             | 2.22             |
| Expectations staying at work                       | 1.95             |
| Disability                                         | 2.43             |
| Work ability in general                            | 3.39             |
| Work ability in the context of work load           | 3.25             |
| Possibilities for returning to work                | 2.43             |

**Table S3.** Missing data analyses of the baseline characteristics of the present study population

| Domains                                            | Categories/ Ranges           | Cases with missing outcome <sup>1</sup><br>(No <sup>2</sup> =87) |                        | Cases with no missing outcome <sup>3</sup><br>(No=571) |          | Chi-square or T-test<br><i>p</i> |
|----------------------------------------------------|------------------------------|------------------------------------------------------------------|------------------------|--------------------------------------------------------|----------|----------------------------------|
|                                                    |                              | Mean /No                                                         | SD <sup>4</sup> /<br>% | Mean /No                                               | SD/<br>% |                                  |
| <b>Demographic</b>                                 |                              |                                                                  |                        |                                                        |          |                                  |
| Age in years                                       | 18-65                        | 48.46                                                            | 10.06                  | 50.49                                                  | 9.50     | 0.07                             |
| Gender                                             | Male                         | 42                                                               | 48%                    | 261                                                    | 46%      | 0.66                             |
| Marital status                                     | Married or partner           | 54                                                               | 63%                    | 426                                                    | 75%      | 0.02                             |
| Breadwinner of the family                          | Yes                          | 65                                                               | 75%                    | 379                                                    | 67%      | 0.13                             |
| Land of birth                                      | The Netherlands              | 75                                                               | 86%                    | 520                                                    | 91%      | 0.15                             |
| Educational level                                  | Primary / Secondary school   | 42                                                               | 48%                    | 225                                                    | 39%      | 0.21                             |
|                                                    | High school                  | 29                                                               | 34%                    | 191                                                    | 34%      | -                                |
|                                                    | Bachelor's / Master's degree | 15                                                               | 18%                    | 152                                                    | 27%      | -                                |
| <b>Socio-economic and work-related</b>             |                              |                                                                  |                        |                                                        |          |                                  |
| Collar job                                         | Blue                         | 27                                                               | 32%                    | 119                                                    | 21%      | 0.04                             |
|                                                    | White                        | 30                                                               | 37%                    | 204                                                    | 37%      | -                                |
|                                                    | Pink                         | 25                                                               | 31%                    | 236                                                    | 42%      | -                                |
| Employed                                           | Yes                          | 73                                                               | 85%                    | 500                                                    | 89%      | 0.27                             |
| Usual working time in hours                        | 4-60                         | 32.43                                                            | 8.77                   | 32.71                                                  | 8.72     | 0.78                             |
| Regular work schedule                              | Yes                          | 56                                                               | 64%                    | 405                                                    | 71%      | 0.21                             |
| Managerial position                                | Yes                          | 13                                                               | 15%                    | 82                                                     | 14%      | 0.89                             |
| Job demands                                        | Psychological                | 20                                                               | 23%                    | 189                                                    | 33%      | 0.17                             |
|                                                    | Physical                     | 33                                                               | 38%                    | 187                                                    | 33%      | -                                |
|                                                    | Combination of both          | 34                                                               | 39%                    | 195                                                    | 34%      | -                                |
| Stressors <sup>5</sup>                             | 16-64                        | 35.53                                                            | 8.77                   | 35.67                                                  | 8.56     | 0.89                             |
| Support <sup>5</sup>                               | 21-84                        | 59.60                                                            | 13.00                  | 61.26                                                  | 11.53    | 0.22                             |
| Previous absenteeism for the same health complaint | Yes                          | 35                                                               | 41%                    | 288                                                    | 51%      | 0.08                             |
| Work disability benefits                           | No / Partial                 | 67                                                               | 77%                    | 424                                                    | 74%      | 0.58                             |
| Adjustments at work                                | Yes                          | 66                                                               | 76%                    | 464                                                    | 81%      | 0.49                             |
| Interventions at work (e.g., job coaching)         | Yes                          | 71                                                               | 82%                    | 513                                                    | 90%      | 0.08                             |
| <b>Health-related</b>                              |                              |                                                                  |                        |                                                        |          |                                  |
| Use of specialist care in the last 2 years         | Yes                          | 74                                                               | 85%                    | 480                                                    | 84%      | 0.81                             |
| Use of psychiatric care in the last 2 years        | Yes                          | 38                                                               | 44%                    | 286                                                    | 50%      | 0.27                             |
| Use of medication                                  | Yes                          | 71                                                               | 83%                    | 473                                                    | 83%      | 0.95                             |
| Depressive disorder <sup>6</sup>                   | 0-21                         | 9.29                                                             | 4.60                   | 7.65                                                   | 4.52     | 0.002                            |
| Anxiety disorder <sup>6</sup>                      | 0-21                         | 8.95                                                             | 4.31                   | 7.96                                                   | 4.15     | 0.04                             |
| Severity of complaints <sup>7</sup>                | 5-30                         | 11.56                                                            | 4.73                   | 11.07                                                  | 4.52     | 0.34                             |
| Physical health <sup>8</sup>                       | 0-100                        | 33.87                                                            | 8.91                   | 34.04                                                  | 9.46     | 0.88                             |
| Mental health <sup>8</sup>                         | 0-100                        | 35.89                                                            | 13.01                  | 38.98                                                  | 12.94    | 0.04                             |
| Health compared to a year ago <sup>8</sup>         | Worse                        | 34                                                               | 39%                    | 207                                                    | 36%      | 0.62                             |
| Hypochondria <sup>9</sup>                          | 0-14                         | 6.29                                                             | 3.41                   | 5.32                                                   | 2.99     | 0.01                             |
| Symptom scale <sup>5</sup>                         | 20-80                        | 42.79                                                            | 11.60                  | 41.21                                                  | 10.24    | 0.19                             |
| Coping strategies <sup>5</sup>                     | 17-68                        | 40.34                                                            | 10.16                  | 41.13                                                  | 9.37     | 0.47                             |
| Subjective health complaints (SHC)                 | Yes                          | 17                                                               | 22%                    | 86                                                     | 17%      | 0.21                             |
| <b>Self-perceived ability</b>                      |                              |                                                                  |                        |                                                        |          |                                  |
| Positive expectations for staying at work          | Yes / Inconclusive           | 46                                                               | 53%                    | 351                                                    | 62%      | 0.13                             |
| Disability <sup>5</sup>                            | 7-28                         | 21.13                                                            | 4.97                   | 20.56                                                  | 4.98     | 0.33                             |

|                                                        |      |       |      |       |      |      |
|--------------------------------------------------------|------|-------|------|-------|------|------|
| Work ability in general <sup>10</sup>                  | 0-10 | 4.34  | 2.24 | 4.60  | 1.99 | 0.28 |
| Work ability in the context of work load <sup>10</sup> | 2-10 | 5.86  | 1.71 | 6.11  | 1.51 | 0.16 |
| Possibilities for returning to work <sup>11</sup>      | 0-36 | 15.04 | 8.58 | 15.30 | 9.59 | 0.81 |

Footnotes:

<sup>1</sup>No fully documented work status during follow-up

<sup>2</sup>No = number

<sup>3</sup>Fully documented work status during follow-up

<sup>4</sup>SD = standard deviation

<sup>5</sup>Based on the work and well-being inventory questionnaire (WBI)

<sup>6</sup>Based on the hospital anxiety and depression scale (HADS)

<sup>7</sup>Based on the patient health questionnaire (PHQ-15)

<sup>8</sup>Based on the short form health survey 36 (SF-36)

<sup>9</sup>Based on the Whitely index questionnaire (WI)

<sup>10</sup>Based on the work ability index (WAI)

<sup>11</sup>Based on the obstacles to return to work questionnaire (ORQ)

**Table S4.** Multivariable logistic regression multiple imputation analysis (pooled data) of all final potential predictors for staying at work for participants with subjective health complaints (SHC) and other disorders separately.

| Domains                                            | Categories/Ranges  | SHC (No <sup>1</sup> =86) |                     |          | Other disorders (No=433) |           |          |
|----------------------------------------------------|--------------------|---------------------------|---------------------|----------|--------------------------|-----------|----------|
|                                                    |                    | OR <sup>2</sup>           | 95% CI <sup>3</sup> | <i>p</i> | OR                       | 95% CI    | <i>p</i> |
| <i>Socio-economic and work-related</i>             |                    |                           |                     |          |                          |           |          |
| Previous absenteeism for the same health complaint | No                 | Reference                 |                     |          | Reference                |           |          |
|                                                    | Yes                | 0.29                      | 0.10-0.85           | 0.02     | 0.69                     | 0.44-1.09 | 0.11     |
| Work disability benefits                           | No / Partial       | Reference                 |                     |          | Reference                |           |          |
|                                                    | Full               | 0.06                      | 0.01-0.57           | 0.01     | 0.13                     | 0.08-0.22 | 0.000    |
| <i>Health-related</i>                              |                    |                           |                     |          |                          |           |          |
| Mental health <sup>4</sup>                         | 0-100              | 1.07                      | 1.02-1.13           | 0.01     | 1.03                     | 1.01-1.05 | 0.001    |
| Coping strategies <sup>5</sup>                     | 17-68              | 1.10                      | 1.02-1.19           | 0.01     | 1.02                     | 1.00-1.04 | 0.15     |
| <i>Self-perceived ability</i>                      |                    |                           |                     |          |                          |           |          |
| Positive expectations for staying at work          | No                 | Reference                 |                     |          | Reference                |           |          |
|                                                    | Yes / Inconclusive | 4.44                      | 1.47-13.45          | 0.01     | 2.88                     | 1.85-4.49 | 0.000    |

Footnotes:

<sup>1</sup>No = number

<sup>2</sup>OR = odds ratio

<sup>3</sup>95% CI = 95% confidence intervals

<sup>4</sup>Based on the short form health survey 36 (SF-36)

<sup>5</sup>Based on the work and well-being inventory questionnaire (WBI)
